# Supplementary material for: Total Atmospheric Mercury Deposition in Forest Areas in Korea
Source: Copernicus journal article supplement (doi:10.5194/acp-2016-7), 2016-01-27
Supplement: Supplementary file [file acp-2016-7-AC1-supplement.zip]

1 **Supplementary Information for**

2  
3 **Total Atmospheric Mercury Deposition in Forest Areas in Korea**

4  
5 Jin-Su Han<sup>1</sup>, Yong-Seok Seo<sup>1,2</sup>, Moon-Kyung Kim<sup>1,2</sup>, Thomas M. Holsen<sup>3</sup>, Seung-Muk Yi<sup>1,2,\*</sup>

6  
7 <sup>1</sup> Department of Environmental Health Sciences, Graduate School of Public Health, Seoul  
8 National University, 1 Gwanak-ro, Gwanak-gu, Seoul 08826, South Korea

9  
10 <sup>2</sup> Institute of Health and Environment, Seoul National University, 1 Gwanak-ro, Gwanak-gu,  
11 Seoul 08826, South Korea

12  
13 <sup>3</sup> Department of Civil and Environmental Engineering, Clarkson University, Potsdam,  
14 NY13699, USA

15  
16  
17  
18  
19  
20  
21  
22  
23  
24 \*Address correspondence to Dr. Seung-Muk Yi, Graduate School of Public Health, Seoul  
25 National University, 1 Gwanak-ro, Gwanak-gu, Seoul 088626, South Korea

26 E-mail) yiseung@snu.ac.kr

27 Telephone) 82-2-880-2736

28 Fax) 82-2-745-9104

**QA/QC**

*Dry deposition for GOM and PBM*

*Relative percent difference (RPD) analyses for replicate GOM and PBM measurements were 19.4% and 22.9%, respectively. Relative Standard Deviation (RSD) measured by injecting mercury vapor standards at the same concentration seven times averaged 2 ~ 5%, within EPA Method 1631 requirements ( $\pm 25\%$ ).*

*TM in wet deposition and throughfall*

*Initial (IPR) and on-going (OPR) precision and recovery measured every 15 samples at the start of the analysis ranged from 80 ~ 107% ( $92.2 \pm 7.0\%$  in average) and 81 ~ 117% ( $96.9 \pm 13.7\%$  in average), respectively with an RPD of 3 ~ 13%. Field blanks were collected monthly from September to December and Hg concentration was  $0.36 \text{ ng L}^{-1}$ . The average lab blank ( $n = 44$ ) concentration was  $0.2 \text{ ng L}^{-1}$ .*

**Table S1. Monthly dry deposition of GOM ( $\mu\text{g m}^{-2} \text{ yr}^{-1}$ ) under forest**

| <b>08-Sep</b> | <b>08-Oct</b> | <b>08-Nov</b> | <b>08-Dec</b> | <b>09-Jan</b> | <b>09-Feb</b> | <b>09-Mar</b> | <b>09-Apr</b> | <b>09-May</b> |
|---------------|---------------|---------------|---------------|---------------|---------------|---------------|---------------|---------------|
| 3.08          | 1.43          | 1.26          | 1.70          | 2.84          | 10.86         | 8.41          | 13.43         | 8.24          |
| <b>09-Jun</b> | <b>09-Jul</b> | <b>09-Aug</b> | <b>09-Sep</b> | <b>09-Sep</b> | <b>09-Nov</b> | <b>09-Dec</b> | <b>10-Jan</b> | <b>10-Feb</b> |
| 9.39          | 6.83          | 1.22          | 0.42          | 2.74          | 0.35          | 1.01          | 11.19         | 1.70          |

**Table S2. Monthly dry deposition of PBM ( $\mu\text{g m}^{-2} \text{ yr}^{-1}$ ) under forest**

| <b>08-Sep</b> | <b>08-Oct</b> | <b>08-Nov</b> | <b>08-Dec</b> | <b>09-Jan</b> | <b>09-Feb</b> | <b>09-Mar</b> | <b>09-Apr</b> | <b>09-May</b> |
|---------------|---------------|---------------|---------------|---------------|---------------|---------------|---------------|---------------|
| 4.91          | 1.91          | 2.13          | 2.19          | 3.30          | 6.02          | 6.25          | 1.85          | 1.79          |
| <b>09-Jun</b> | <b>09-Jul</b> | <b>09-Aug</b> | <b>09-Sep</b> | <b>09-Sep</b> | <b>09-Nov</b> | <b>09-Dec</b> | <b>10-Jan</b> | <b>10-Feb</b> |
| 7.98          | 19.38         | 1.54          | 1.60          | 0.79          | 1.10          | 1.76          | 12.15         | 2.08          |

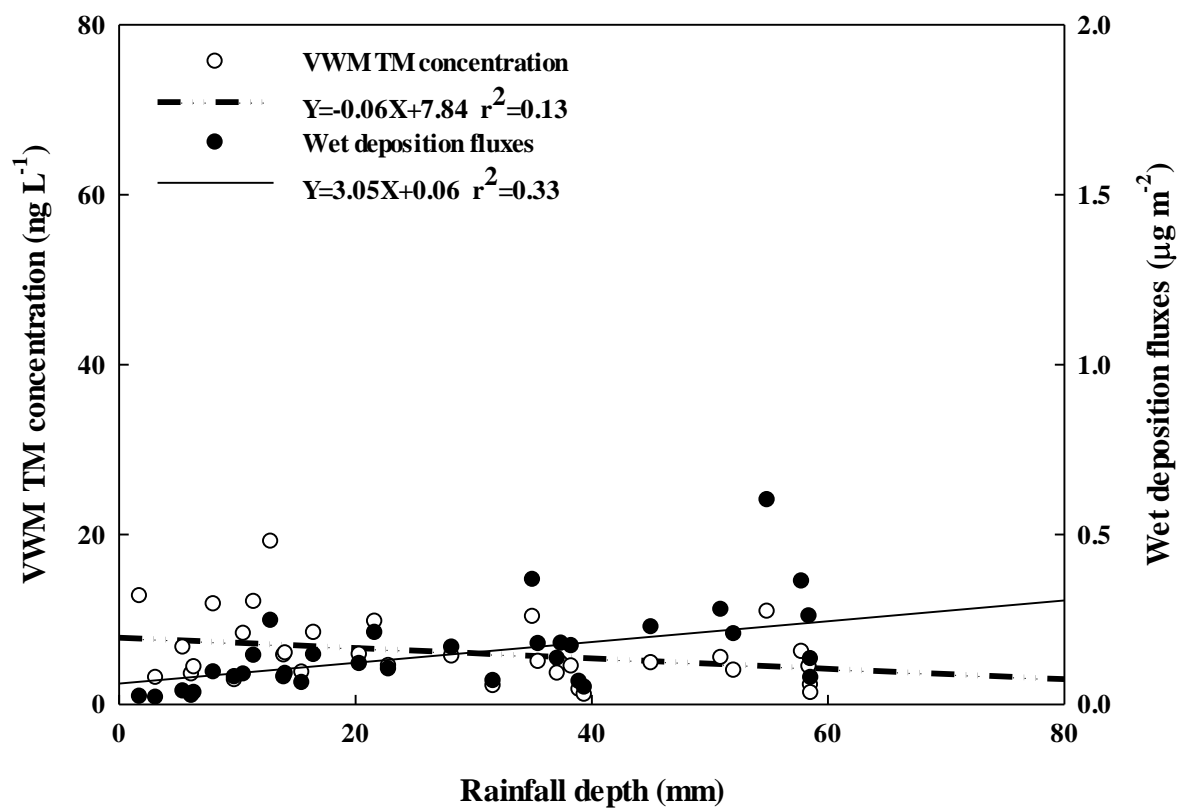

**Figure S1. Relationship between rainfall depth and VWM TM concentration and fluxes in precipitation.**

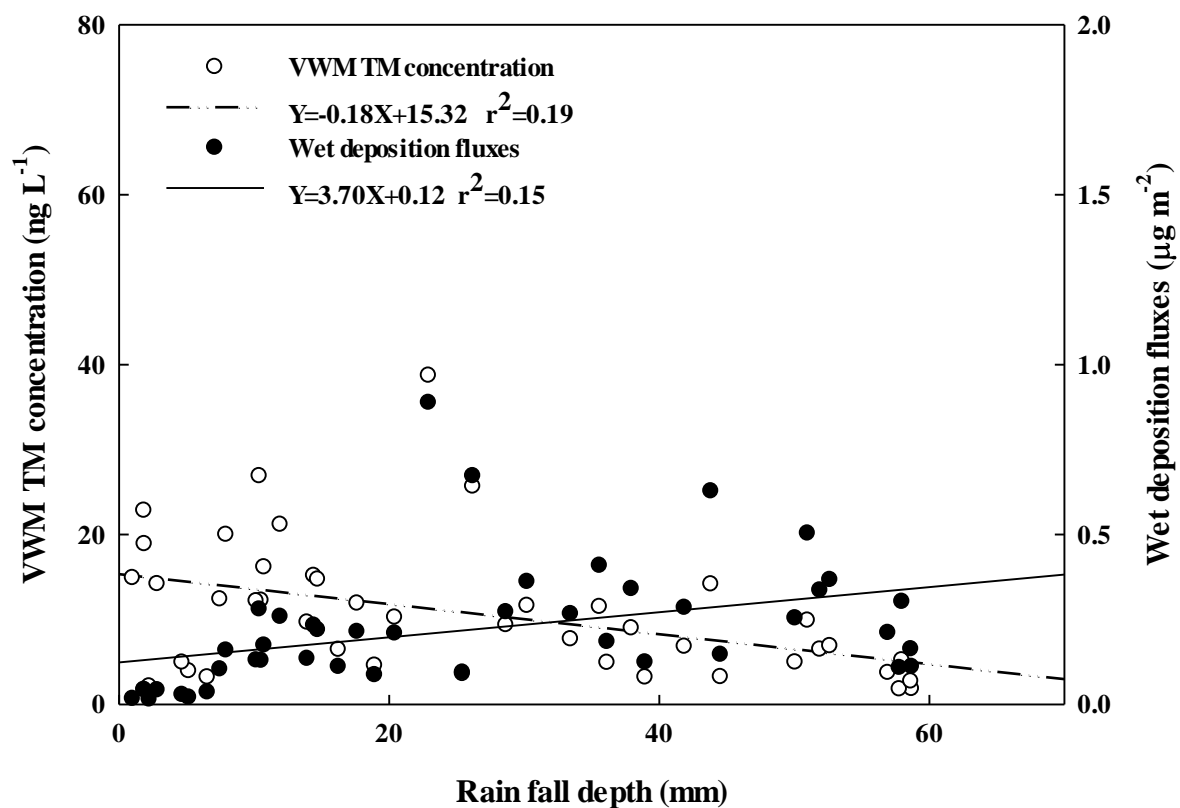

**Figure S2. Relationship between rainfall depth and VWM TM concentration and fluxes in throughfall.**
